# Supplementary material
Source: Springer Nature journal article supplement (https://www.springermedizin.de/resource/supplementary/13075_2004_1375_MOESM5_ESM.pdf/9689632)

**(a)**

- zymosan alone
- zymosan + pre adm. of laminarin
- zymosan + co adm. of laminarin

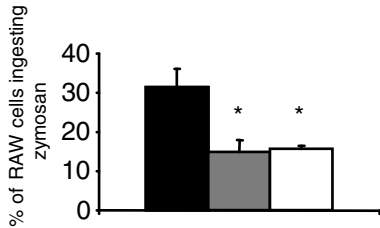**(b)**

- 180  $\mu$ g zymosan alone
- 180  $\mu$ g zymosan + 500  $\mu$ g laminarin

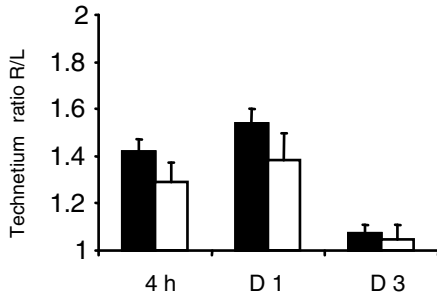

Supplement: MOESM5 [file 9689632]
